# Supplementary material for: Abiotic microcompartments form when neighbouring droplets fuse: an electrochemiluminescence investigation
Source: Royal Society of Chemistry journal article supplement (doi:10.1039/d2sc06553c), 2022-12-27
Supplement: d2sc06553c1.pdf [file d2sc06553c1.pdf]

*Supporting Information:*

# Abiotic Microcompartments Form when Neighbouring Droplets Fuse: An Electrochemiluminescence Investigation

Silvia Voci<sup>a</sup>, Thomas B. Clarke<sup>a</sup>, Jeffrey E. Dick<sup>a,b,\*</sup>

<sup>a</sup>Department of Chemistry, Purdue University, West Lafayette, IN, 47907 USA

<sup>b</sup>Elmore Family School of Electrical and Computer Engineering, Purdue University, West Lafayette, IN 47907, USA

\*Corresponding author: [jdick@purdue.edu](mailto:jdick@purdue.edu)

| Table of Contents                                                                                              | Pages |
|----------------------------------------------------------------------------------------------------------------|-------|
| 1. Experimental Section                                                                                        | S2    |
| 2. Example of Chronoamperogram Recorded During an ECL Imaging Experiment<br>( <b>Figure S1</b> )               | S3    |
| 3. Example of ECL Images Sequences Obtained with a Pt as working electrode material ( <b>Figure S2</b> )       | S4    |
| 4. Bright-field Images of the Water droplets in Figure 2, Before and After Coalescence<br>( <b>Figure S3</b> ) | S5    |
| 5. Example of ECL Images Sequences<br>( <b>Figure S4, Figure S5</b> )                                          | S6-S7 |
| 6. Cobalt Deposition Experiment and SEM Images<br>( <b>Figure S6</b> )                                         | S8    |
| References                                                                                                     | S9    |

## 1. Experimental Section

**Chemicals.** 1,2-Dichloroethane (99.8%), tetrabutylammonium perchlorate (99%), sodium oxalate (99%), and cobalt (II) chloride hexahydrate (98%) were purchased from Sigma Aldrich. Tris(bipyridine)ruthenium (II) chloride hexahydrate ( $[\text{Ru}(\text{bpy})_3][\text{Cl}_2] \cdot 6 \text{ H}_2\text{O}$ , 98%) was purchased from Acros Organics. Potassium chloride was purchased from Fisher Bioreagents. All chemicals were used as received. Aqueous solutions were prepared from ultrapure  $\text{H}_2\text{O}$  ( $>18 \text{ M}\Omega \cdot \text{cm}$ , Thermo Scientific).

**Water-in-DCE emulsion preparation procedure.** The emulsion was prepared following a previously published method.<sup>1</sup> Briefly, an aliquot of 100  $\mu\text{L}$  of aqueous solution containing 50 mM of sodium oxalate and 10 mM of Tris(bipyridine)ruthenium (II) chloride hexahydrate was added to 5 mL of a DCE/[TBA][ $\text{ClO}_4$ ] 0.1 M in a 20 mL glass scintillation vial. For the cobalt deposition experiment, 50  $\mu\text{L}$  of aqueous solution containing 10 mM of cobalt (II) chloride hexahydrate and 1 M of potassium chloride was added to 5 mL of a DCE/[TBA][ $\text{ClO}_4$ ] 0.1 M in a 20 mL glass scintillation vial. The two-phases solution was then ultrasonicated (500 W, 40% amplitude) with a pulsing method (5 s on 5 s off, 10 cycles).

**Optical and ECL microscopy.** The imaging system was composed by a Leica Dmi8 microscope (Leica Microsystems, Germany) equipped with a Lambda LS xenon arc lamp (Sutter Instrument Company, Novato, CA), a Leica CTR advanced electronics box (Leica Microsystems, Germany), a Leica SP box LMT200 (Leica Microsystems, Germany), a Complementary Metal-Oxide Semiconductor camera (Orca-Quest Qc-MOS C15550-20UP from Hamamatsu, Hamamatsu Japan), a Lambda SC SmartShutter controller (Sutter Instrument Company, Novato, CA), two Lambda VF-5 tunable filter changers (Sutter Instrument Company, Novato, CA) and a Lambda 10-3 optical filter changer and SmartShutter control system (Sutter Instrument Company, Novato, CA). The objectives used during the imaging experiments were a 5x, NA 0.12, 1.4 cm free working distance for Figures 2 and 3 and 63x, NA 1.4, working distance 0.14 mm for Figures S3 and S4. ECL reactants were electrogenerated by performing chronoamperometry at a 601E Electrochemical Workstation (CH Instruments, Austin, TX) with a Ag/AgCl (saturated KCl) as reference electrode (RE). The RE had a Vycor frit sealed with a Teflon wrap for compatibility with DCE. The glassy carbon working electrode ( $r = 1.5 \text{ mm}$ ) was polished on a 10,000-grit polishing pad (Buehler, Lake Bluff, IL) with 0.05  $\mu\text{m}$  alumina powder, followed by polishing on a clean polishing cloth to remove residual alumina powder. After polishing, the electrode was rinsed with water, ethanol and then DCE. A glassy carbon rod was used as the counter electrode.

**SEM and EDX Data.** A Helios 600 Nanolab dual beam system (FEI, Hillsboro, OR) was used to collect scanning electron microscopy (SEM) images. An INCA PentaFet-x3 detector (Oxford Instruments, Abingdon, UK) was used to perform energy dispersive X-ray spectroscopy (EDX). All SEM images and EDX data were collected with 20 keV and 0.69 nA beam.

## 2. Example of Chronoamperogram Recorded During an ECL Imaging Experiment

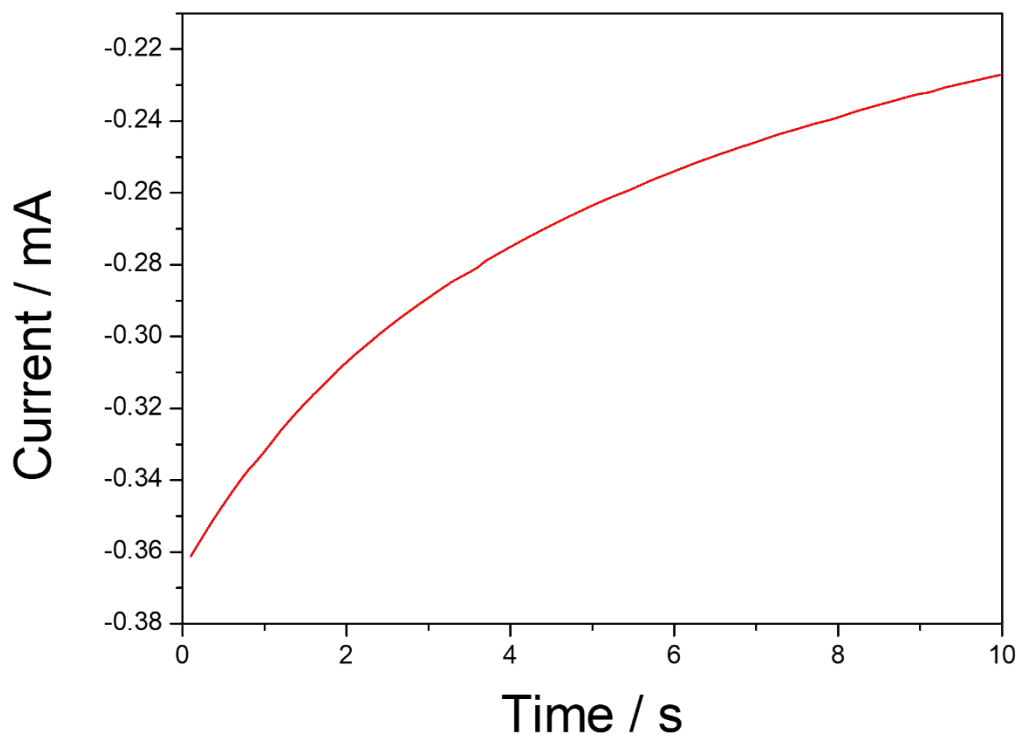

**Figure S1** Chronoamperogram recorded by applying 1.5 V vs Ag/AgCl on a glassy carbon working electrode ( $d = 3$  mm) in an emulsion composed of an aqueous solution of 10 mM tris(bipyridine)ruthenium(II) dichloride and 50 mM sodium oxalate suspended in a continuous phase of 1,2-dichloroethane/0.1 M tetrabutylammonium perchlorate.

### 3. Example of ECL Images Sequences Obtained with a Pt as working electrode material

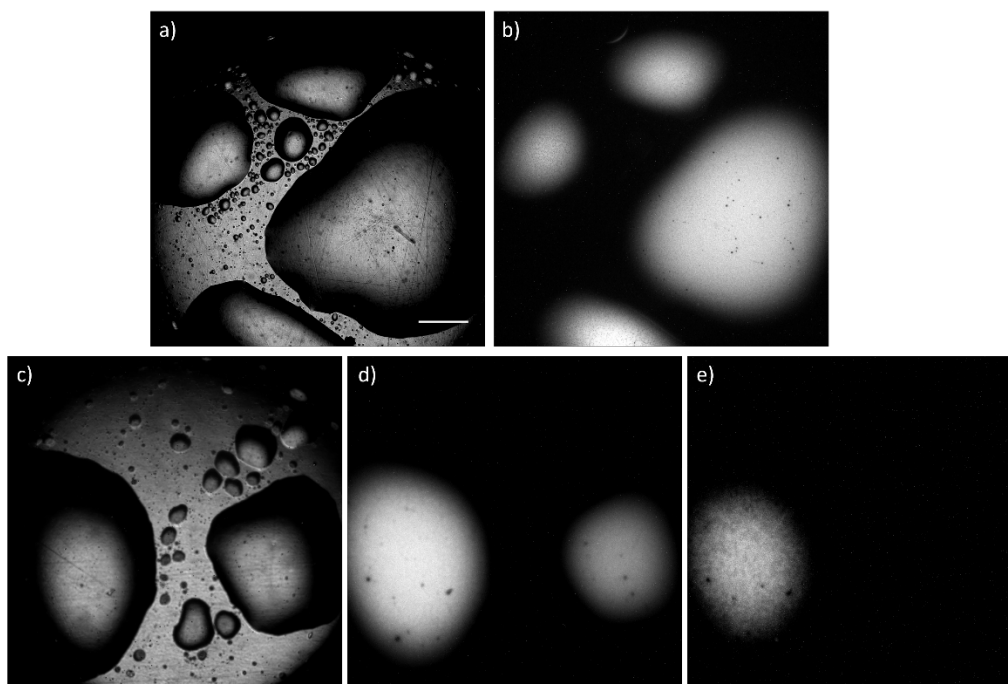

**Figure S2** a) Optical and b) ECL image of water droplets loaded with 10 mM tris(bipyridine)ruthenium(II) dichloride and 50 mM sodium oxalate in 1,2-dichloroethane with 0.1 M tetrabutylammonium perchlorate continuous phase; c) optical and d) and e) ECL images in sequence water droplets loaded with 10 mM tris(bipyridine)ruthenium(II) dichloride and 50 mM sodium oxalate in 1,2-dichloroethane with 0.1 M tetrabutylammonium perchlorate continuous phase. ECL images were obtained by applying 1.5 V vs Ag/AgCl on a platinum working electrode for 10 seconds of exposure time. Scale bar: 500  $\mu\text{m}$ .

4. Bright-field Images of the Water droplets in Figure 2, Before and After Coalescence

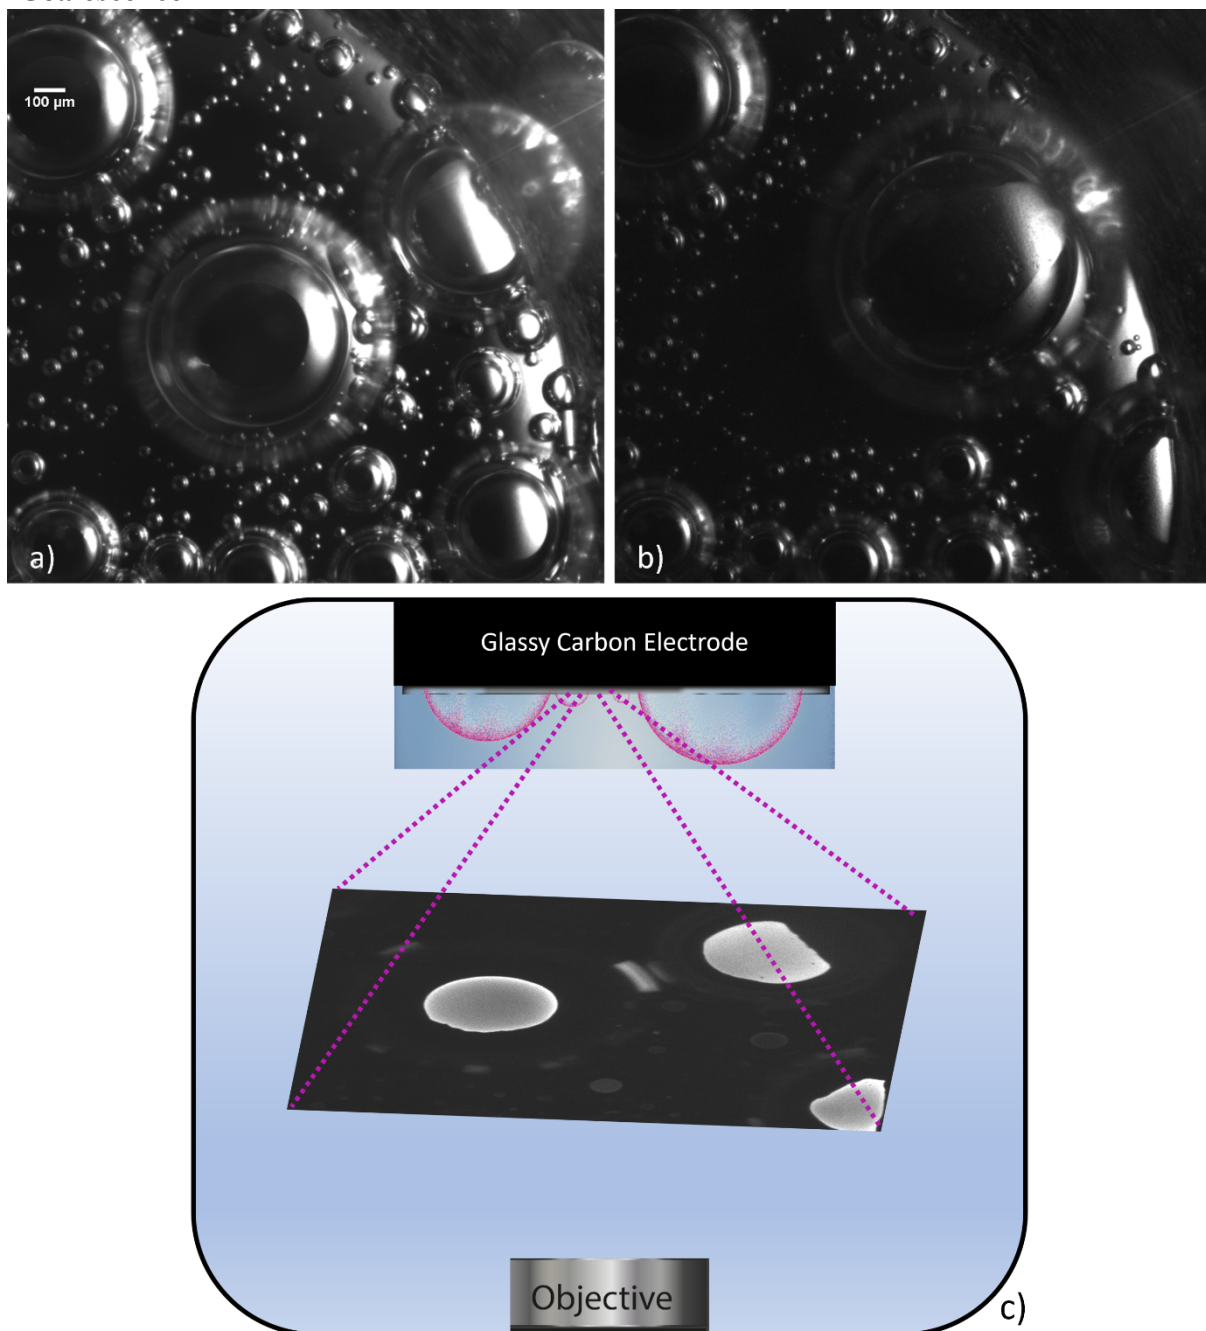

**Figure S3** Bright-field images recorded before a) and after b) the coalescence event reported as ECL images in **Figure 2**; c) schematic representation of the ECL imaging experiment reported in **Figure 2**.

## 5. Example of ECL Images Sequences

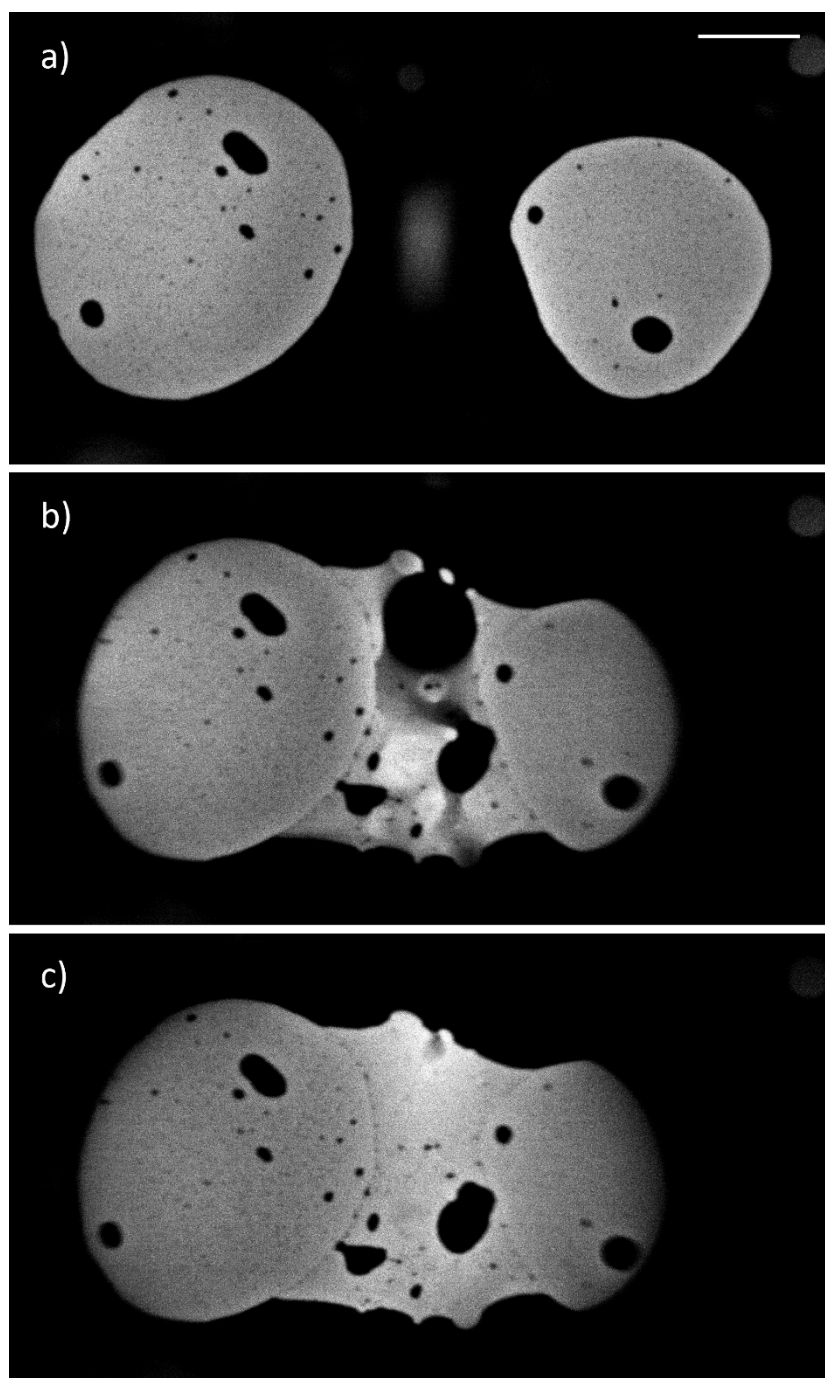

**Figure S4** ECL images in sequence of two water droplets loaded with 10 mM tris(bipyridine)ruthenium(II) dichloride and 50 mM sodium oxalate in 1,2-dichloroethane with 0.1 M tetrabutylammonium perchlorate continuous phase. ECL images were obtained by applying 1.5 V vs Ag/AgCl on the glassy carbon working electrode for 500 milliseconds of exposure time. Scale bar: 20  $\mu\text{m}$ .

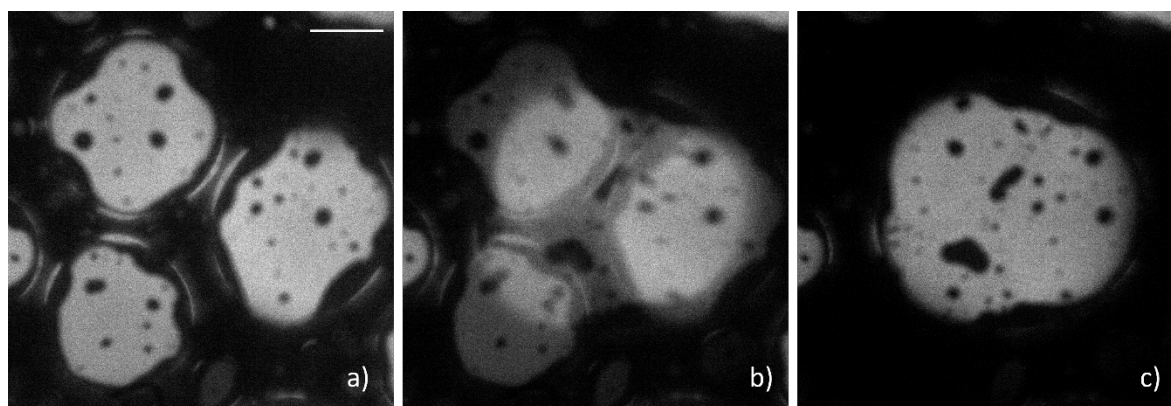

**Figure S5** ECL images in sequence of three water droplets loaded with 10 mM tris(bipyridine)ruthenium(II) dichloride and 50 mM sodium oxalate in 1,2-dichloroethane with 0.1 M tetrabutylammonium perchlorate continuous phase. ECL images were obtained by applying 1.5 V vs Ag/AgCl on the glassy carbon working electrode for 500 milliseconds of exposure time. Scale bar: 20  $\mu\text{m}$ .



## 6. Cobalt Deposition Experiment and SEM Images

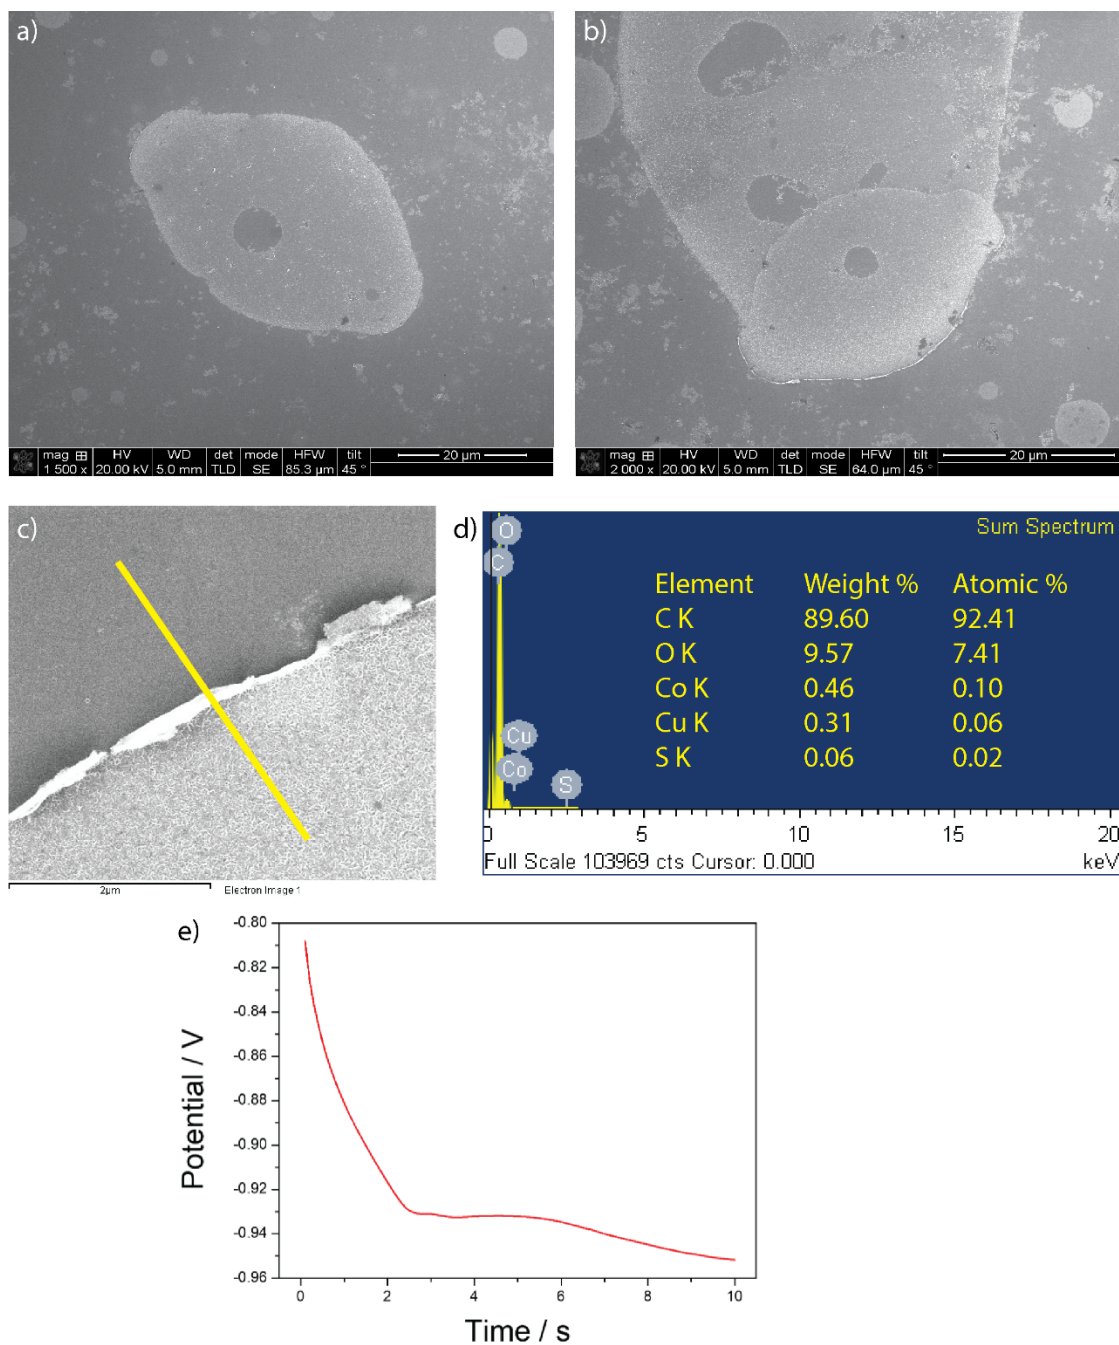

**Figure S6** Cobalt deposition experiment where 50  $\mu\text{L}$  of 10 mM  $\text{CoCl}_2 \cdot 6\text{H}_2\text{O}$  + 1M KCl was suspended in a 1,2-dichloroethane solution of 0.1 M tetrabutylammonium perchlorate. For deposition, 50  $\mu\text{A}$  of cathodic current was applied for 10 s across the glassy carbon ( $d = 3$  mm) working electrode using chronopotentiometry. Scanning electron microscopy images (a), b), and c)) showing regions of cobalt deposition with clear inclusions preventing deposition. Energy dispersive X-ray spectrum (d)) collected from the line segment in c), showing the elemental composition of the deposited material. Chronopotentiogram (e)) measured during the passage of 50  $\mu\text{A}$  of cathodic current for 10 s using a glassy carbon ( $d = 3$  mm) working electrode, with potentials measured vs a Ag/AgCl reference electrode.



## References

1. Glasscott M., Pendergast A.D., Goines S., Bishop A.R., Hoang A.T., Renault C., Dick J.E., *Nat. Comm.*, **2019**, *10*, 2650.
